# Supplementary material for: Trophic transfer of Cu, Zn, Cd, and Cr, and biomarker response for food webs in Taihu Lake, China
Source: Royal Society of Chemistry journal article supplement (doi:10.1039/c7ra11677b), 2018-01-01
Supplement: c7ra11677b1.pdf [file c7ra11677b1.pdf]

Electronic Supplementary Material (ESI) for RSC Advances.

**Trophic transfer of Cu, Zn, Cd, and Cr, and biomarker  
response for food webs in Taihu Lake, China**

Jinxing Zuo<sup>a</sup>, Wenhong Fan<sup>a,\*</sup>, Xiaolong Wang<sup>a</sup>, Jinqian Ren<sup>a</sup>, YiLin  
Zhang<sup>a</sup>, Xiangrui Wang<sup>a</sup>, Yuan Zhang<sup>b</sup>, Tao Yu<sup>b</sup>, Xiaomin Li<sup>a</sup>

<sup>a</sup> *School of Space and Environment, Beihang University, Beijing 100191, PR China.*

<sup>b</sup> *Chinese Research Academy of Environmental Sciences, Beijing 100012, PR China.*

\*Corresponding to:

Email: [fanwh@buaa.edu.cn](mailto:fanwh@buaa.edu.cn) Tel: (86)-10-82338830

## **Supplementary Materials and Methods**

Water samples were collected from 9 sites in different representative parts of Taihu Lake. The temperature and pH of the water samples were measured at the sampling sites by portable WTW VARIO portable pH/temperature analyzer, German. After infiltration through a 0.45 µm membrane (Mixed cellulose ester membrane, Whatman), the Cu, Zn, Cr, Cd and other HMs were then measured by ICP-MS (VG PQ2 TURBO), the K, Ca, Na and Mg concentrations were analyzed using ICP-OES (Optima 5300 DV), anions were measured using ion chromatography (Metrohm 792), and total organic carbon was analysed by total organic carbon analyzer (TOC-V CPH, SHIMADZU). Each sample had three replicates. The metals speciation of Cu, Zn, Cr, and Cd in filtered water samples was simulated and analyzed with Visual MINTEQ (ver. 3.1).

Supplementary Results

Table S1 Main water quality parameters of Taihu Lake.

| sample | TOC<br>(ppm) | pH   | T<br>(°C) | K<br>(ppm) | Na<br>(ppm) | Ca<br>(ppm) | Mg<br>(ppm) | CL <sup>-</sup><br>(ppm) | SO <sub>4</sub> <sup>2-</sup><br>(ppm) | NO <sub>3</sub> <sup>-</sup><br>(ppm) | CO <sub>3</sub> <sup>2-</sup><br>(ppm) |
|--------|--------------|------|-----------|------------|-------------|-------------|-------------|--------------------------|----------------------------------------|---------------------------------------|----------------------------------------|
| T1     | 25.91        | 7.58 | 22.1      | 5.34       | 48.8        | 37          | 10.1        | 50.06                    | 64.8                                   | 4.56                                  | 72.1                                   |
| T2     | 25.27        | 6.88 | 21.5      | 5.62       | 27.5        | 33.6        | 7.81        | 24.11                    | 21.3                                   | 3.2                                   | 87                                     |
| T3     | 31.25        | 7.86 | 22.2      | 5.69       | 57.9        | 32.8        | 4.28        | 16.5                     | 23.6                                   | 4.25                                  | 75.2                                   |
| T4     | 29.54        | 6.65 | 20.8      | 4.4        | 45.2        | 34          | 9.32        | 31.51                    | 18.8                                   | 3.86                                  | 73.9                                   |
| T5     | 25.89        | 6.54 | 20.6      | 3.74       | 61.4        | 39.1        | 7.81        | 40.78                    | 24.4                                   | 1.2                                   | 76.7                                   |
| T6     | 22.85        | 6.54 | 19.8      | 3.83       | 9.02        | 26.5        | 5.04        | 9.98                     | 11                                     | 2.59                                  | 67.4                                   |
| T7     | 22.27        | 6.68 | 20.6      | 3.75       | 23.6        | 34.4        | 7.81        | 31.51                    | 18.8                                   | 0.88                                  | 69.3                                   |
| T8     | 20.69        | 6.75 | 21.2      | 4.02       | 12.1        | 26.98       | 6.85        | 27.42                    | 23.4                                   | 1.36                                  | 65.4                                   |
| T9     | 21.25        | 6.86 | 19.8      | 3.68       | 28.32       | 1.25        | 5.89        | 36.85                    | 34.2                                   | 1.89                                  | 58.2                                   |
| mean   | 24.99        | 6.93 | 21.5      | 4.45       | 34.87       | 29.51       | 7.21        | 29.86                    | 26.70                                  | 2.64                                  | 71.69                                  |

Table S2 The metal speciation of Cu, Zn, Cr and Cd in water samples of Taihu Lake.(%)

| Metal | T1                               | T2     | T3     | T4     | T5     | T6     | T7     | T8     | T9     | Mean   |        |
|-------|----------------------------------|--------|--------|--------|--------|--------|--------|--------|--------|--------|--------|
| Cd    | Cd <sup>2+</sup>                 | 69.906 | 75.189 | 69.277 | 73.339 | 75.433 | 76.485 | 76.933 | 75.112 | 76.648 | 69.813 |
|       | Cd-OH <sup>-</sup>               | 0.114  | 0.025  | 0.222  | 0.014  | 0.011  | 0.012  | 0.017  | 0.025  | 0.012  | 0.050  |
|       | Cd-DOM                           | 14.878 | 16.989 | 20.342 | 18.998 | 15.162 | 19.43  | 14.909 | 16.675 | 17.940 | 21.702 |
|       | Cd-Cl <sup>-</sup>               | 6.716  | 3.648  | 2.279  | 4.605  | 6.021  | 1.624  | 4.921  | 4.268  | 2.864  | 4.105  |
|       | Cd-SO <sub>4</sub> <sup>2-</sup> | 4.812  | 1.877  | 1.908  | 1.568  | 2.004  | 1.123  | 1.707  | 2.209  | 1.768  | 2.108  |
|       | Cd-NO <sub>3</sub> <sup>-</sup>  | 0.014  | 0.011  | 0.013  | 0.012  | -      | -      | -      | -      | -      | 0.012  |
|       | Cd-CO <sub>3</sub> <sup>2-</sup> | 3.559  | 2.247  | 5.947  | 1.459  | 1.358  | 1.312  | 1.507  | 1.699  | 0.757  | 2.205  |
| Cr    | CrO <sub>4</sub> <sup>2-</sup>   | 75.998 | 62.503 | 78.089 | 54.599 | 49.481 | 49.866 | 55.104 | 63.232 | 72.286 | 62.351 |
|       | HCrO <sub>4</sub> <sup>-</sup>   | 4.993  | 21.398 | 2.78   | 31.451 | 36.212 | 38.915 | 30.019 | 23.113 | 26.844 | 23.969 |
|       | NaCrO <sub>4</sub> <sup>-</sup>  | 0.576  | 0.282  | 0.734  | 0.4    | 0.483  | 0.078  | 0.214  | 0.129  | 0.351  | 0.361  |
|       | KCrO <sub>4</sub> <sup>-</sup>   | 0.028  | 0.025  | 0.032  | 0.017  | 0.013  | 0.015  | 0.015  | 0.019  | 0.020  | 0.020  |
|       | CaCrO <sub>4</sub> <sup>-</sup>  | 18.404 | 15.792 | 18.365 | 13.533 | 13.810 | 11.127 | 14.648 | 13.508 | 0.499  | 13.298 |
| Cu    | Cu <sup>2+</sup>                 | 9.265  | 8.546  | 3.379  | 8.274  | 10.436 | 8.569  | 10.494 | 9.408  | 1.536  | 7.767  |
|       | Cu-OH <sup>-</sup>               | 1.321  | 1.325  | 5.337  | 0.752  | 0.716  | 0.627  | 1.021  | 0.931  | 0.233  | 1.363  |
|       | Cu-DOM                           | 78.314 | 76.853 | 79.29  | 85.302 | 83.496 | 86.638 | 80.951 | 83.04  | 96.574 | 83.384 |
|       | Cu-Cl <sup>-</sup>               | 0.018  | -      | -      | 0.010  | 0.017  | -      | 0.013  | 0.011  | -      | 0.014  |
|       | Cu-SO <sub>4</sub> <sup>2-</sup> | 0.621  | 0.209  | 0.291  | 0.010  | 0.271  | 0.123  | 0.228  | 0.271  | 0.072  | 0.233  |
|       | Cu-NO <sub>3</sub> <sup>-</sup>  | -      | -      | -      | -      | -      | -      | -      | -      | -      | -      |
|       | Cu-CO <sub>3</sub> <sup>2-</sup> | 10.450 | 13.058 | 11.698 | 5.491  | 5.059  | 4.034  | 7.282  | 6.33   | 1.578  | 7.220  |
| Zn    | Zn <sup>2+</sup>                 | 65.336 | 70.102 | 56.941 | 68.542 | 73.057 | 69.490 | 73.724 | 70.669 | 67.920 | 68.420 |
|       | Zn-OH <sup>-</sup>               | 2.201  | 0.336  | 5.154  | 0.182  | 0.138  | 0.140  | 0.214  | 0.328  | 0.132  | 0.981  |
|       | Zn-DOM                           | 22.034 | 25.099 | 26.494 | 28.137 | 23.273 | 27.974 | 22.642 | 24.865 | 29.863 | 25.598 |
|       | Zn-Cl <sup>-</sup>               | 0.184  | 0.100  | 0.055  | 0.127  | 0.171  | 0.044  | 0.139  | 0.118  | 0.064  | 0.111  |

| Metal                            | T1    | T2    | T3    | T4    | T5    | T6    | T7    | T8    | T9    | Mean  |
|----------------------------------|-------|-------|-------|-------|-------|-------|-------|-------|-------|-------|
| Zn-SO <sub>4</sub> <sup>2-</sup> | 4.256 | 1.662 | 1.489 | 1.391 | 1.843 | 0.969 | 1.553 | 1.973 | 1.279 | 1.824 |
| Zn-NO <sub>3</sub> <sup>-</sup>  | -     | -     | -     | -     | -     | -     | -     | -     | -     | -     |
| Zn-CO <sub>3</sub> <sup>2-</sup> | 5.974 | 2.691 | 9.855 | 1.61  | 1.503 | 1.367 | 1.723 | 2.04  | 0.736 | 3.055 |

NOTE: “-“ means no simulation results
